# Supplementary material for: Avian Haemosporidian Infection in Wildlife Rehabilitation Centres of Portugal: Causes, Consequences, and Genetic Diversity
Source: MDPI journal article supplement (doi:10.3390/ani14081216), 2024-04-18
Supplement: s1 [file s1]

**Supplementary Table 1.** MalAvi parasite lineages, Parasite, genus (H *Haemoproteus*, P *Plasmodium*, L *Leucocytozoon*), GenBank accession numbers, recorded host in this study (Host), and alternative hosts and alternative location in which parasite lineages were previously recorded. Asterisk (\*) in parasite lineage indicates new haemosporidian lineages not recorded in previous studies, where symbol \$ represents new host record for this haemosporidian lineage and where symbol # represents new geographical record for this haemosporidian lineage (according to MalAvi database, Version 2.5.8, October 2023, [13]).

| MalAvi lineage | Parasite                         | Genus | GenBank # | Host                                                | Alternative host                                                                                                                      | Alternative location                                                                                                                                                                       |
|----------------|----------------------------------|-------|-----------|-----------------------------------------------------|---------------------------------------------------------------------------------------------------------------------------------------|--------------------------------------------------------------------------------------------------------------------------------------------------------------------------------------------|
| Not defined #  | <i>Leucocytozoon</i> sp.         | L     | OL897562  | <i>Bubo bubo</i> \$                                 |                                                                                                                                       |                                                                                                                                                                                            |
| Not defined #  | <i>Haemoproteus</i> sp.          | H     | ON950078  | <i>Larus fuscus</i> \$; <i>Larus michahellis</i> \$ |                                                                                                                                       |                                                                                                                                                                                            |
| ARCIN01* #     | <i>Leucocytozoon</i> sp.         | L     | PP457803  | <i>Ardea cinerea</i> \$                             |                                                                                                                                       |                                                                                                                                                                                            |
| ATNO1          | <i>Leucocytozoon</i> sp.         | L     | KJ488699  | <i>Streptopelia decaocto</i> \$                     | <i>Athene noctua</i>                                                                                                                  | Europe (Portugal), Africa (Morocco)                                                                                                                                                        |
| BUBO01 #       | <i>Leucocytozoon danilewskyi</i> | L     | MK330142  | <i>Bubo bubo</i>                                    | <i>Bubo bubo</i>                                                                                                                      | Europe (Spain)                                                                                                                                                                             |
| CIAE02         | <i>Leucocytozoon</i> sp.         | L     | MK330160  | <i>Buteo buteo</i>                                  | Falconiformes, Gruiformes, Charadriiformes, Piciformes, Strigiformes, Ciconiiformes, Cuculiformes, Coraciiformes, Phoenicopteriformes | Europe (Spain, Germany, Poland, Portugal, Sweden, Austria), Asia (Philippines, Turkey, Russia, Mongolia, Japan, China, Thailand), Africa (South Africa)                                    |
| COCOR02 #      | <i>Leucocytozoon</i> sp.         | L     | JX867111  | <i>Garrulus glandarius</i>                          | <i>Garrulus glandarius</i> , <i>Corvus corax</i>                                                                                      | Europe (Bulgaria, Slovakia, Germany)                                                                                                                                                       |
| GAGLA05        | <i>Haemoproteus</i> sp.          | H     | KJ488735  | <i>Garrulus glandarius</i>                          | <i>Garrulus glandarius</i> , <i>Corvus corax</i>                                                                                      | Europe (Bulgaria, Portugal), Africa (Morocco)                                                                                                                                              |
| LARFUS01* #    | <i>Haemoproteus</i> sp.          | H     | PP547804  | <i>Larus fuscus</i> \$; <i>Larus michahellis</i> \$ |                                                                                                                                       |                                                                                                                                                                                            |
| LINN1          | <i>Plasmodium matutum</i>        | P     | MK330156  | <i>Larus michahellis</i> \$                         | Passeriformes, Apterygiformes, Sphenisciformes, Gruiformes, Strigiformes, Charadriiformes, Falconiformes                              | Europe (Austria, Hungary, Sweden, United Kingdom, Portugal, Spain, Czech Republic, Italy, Germany, Switzerland, Slovakia, Poland), Oceania (New Zealand), Asia (Japan) North America (USA) |

|            |                            |   |          |                              |                                                                        |                                                      |
|------------|----------------------------|---|----------|------------------------------|------------------------------------------------------------------------|------------------------------------------------------|
| MILVUS02 # | <i>Leucocytozoon</i> sp.   | L | JN164717 | <i>Accipiter gentilis</i> \$ | <i>Buteo buteo, Buteo lagopus, Milvus milvus, Haliaeetus albicilla</i> | Europe (Austria, Spain)                              |
| STAL2      | <i>Haemoproteus syrnii</i> | H | KJ488773 | <i>Strix aluco</i>           | <i>Strix aluco, Strix nebulosa, Strix uralensis, Bubo bubo</i>         | Europe (Portugal, France, Germany), Africa (Morocco) |
| STAL3 #    | <i>Leucocytozoon</i> sp.   | L | MK652258 | <i>Strix aluco</i>           | <i>Strix aluco</i>                                                     | Europe (Austria)                                     |
| STAL5 #    | <i>Leucocytozoon</i> sp.   | L | KC876042 | <i>Strix aluco</i>           | <i>Strix aluco</i>                                                     | Asia (Turkey)                                        |
| STRURA03 # | <i>Haemoproteus</i> sp.    | H | KJ488826 | <i>Bubo bubo</i>             | <i>Bubo scandiacus, Bubo bubo, Strix nebulosa, Strix uralensis</i>     | Europe (Austria, France, Switzerland)                |

---
